# Supplementary material for: Magnetic ordering in a vanadium-organic coordination polymer using a pyrrolo[2,3-d:5,4-d′]bis(thiazole)-based ligand
Source: PubMed Central journal article supplement — RSC Adv. 2018 Oct 25;8(63):36223–32. doi: 10.1039/c8ra05697h (PMC9088712; doi:10.1039/c8ra05697h), 2018-10-25
Supplement: RA-008-C8RA05697H-s001.pdf [file RA-008-C8RA05697H-s001.pdf]

## Supporting Information

for

### **Magnetic Ordering in a Vanadium-Organic Coordination Polymer Using a Pyrrolo[2,3-*d*:5,4-*d'*]bis(thiazole)-based Ligand**

*Yulia A. Getmanenko,<sup>a\*</sup> Christopher S. Mullins,<sup>b</sup> Vladimir N. Nesterov,<sup>c</sup> Stephanie Lake,<sup>b</sup>*

*Chad Risko<sup>b</sup> and Ezekiel Johnston-Halperin<sup>a</sup>*

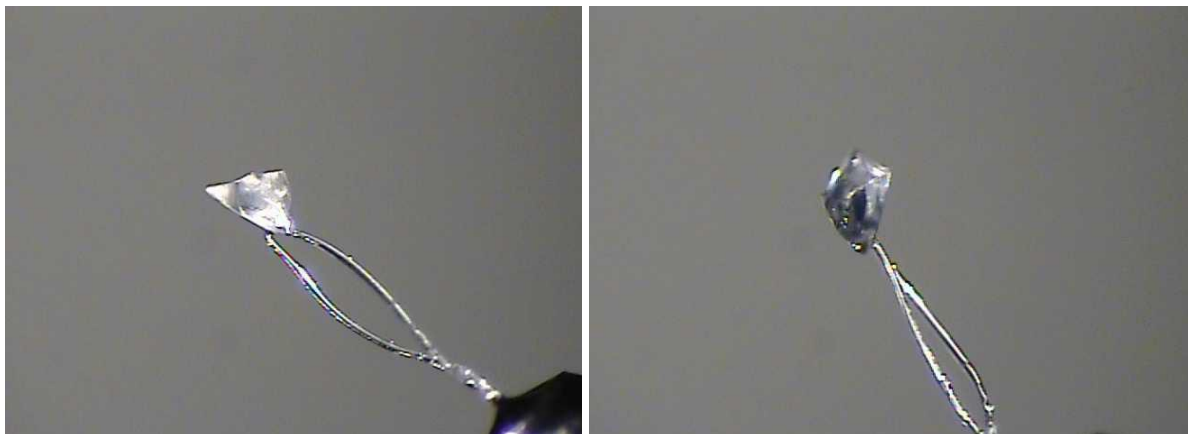

**Figure S1.** Photographs of single crystal of 4-hexyl-4*H*-pyrrolo[2,3-*d*:5,4-*d'*]bis(thiazole) (**5**).

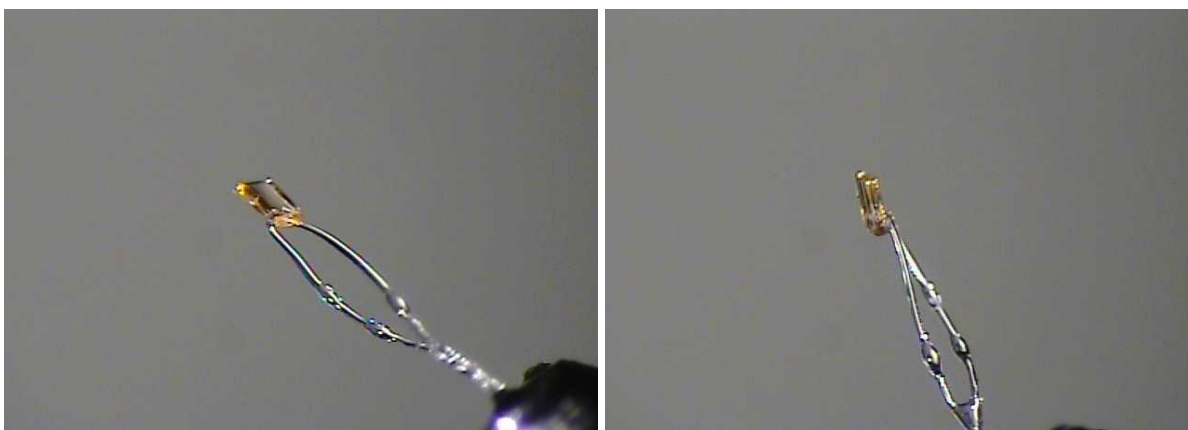

**Figure S2.** Photographs of a single crystal of 4-hexyl-2,6-diiodo-4*H*-pyrrolo[2,3-*d*:5,4-*d'*]bis(thiazole) (**6**)

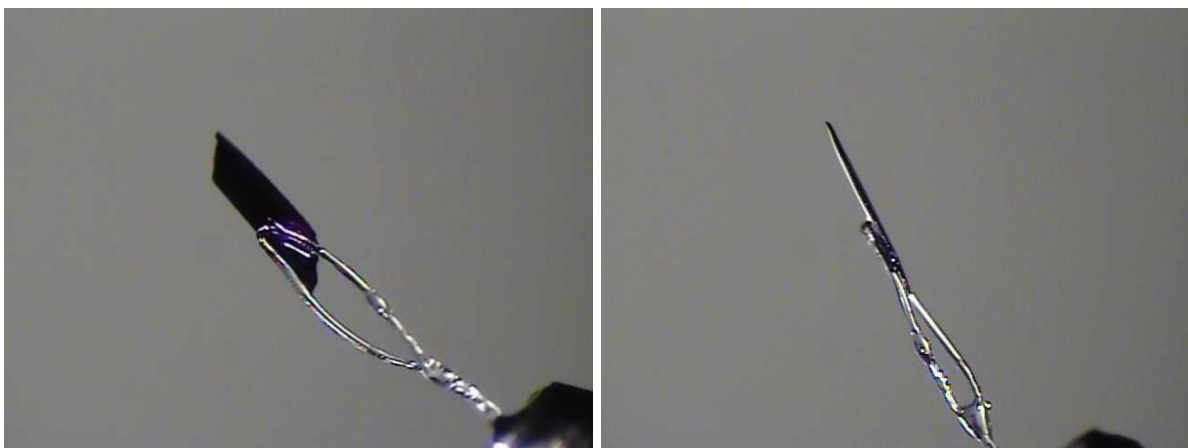

**Figure S3.** Photographs of a single crystal of ligand **7**.

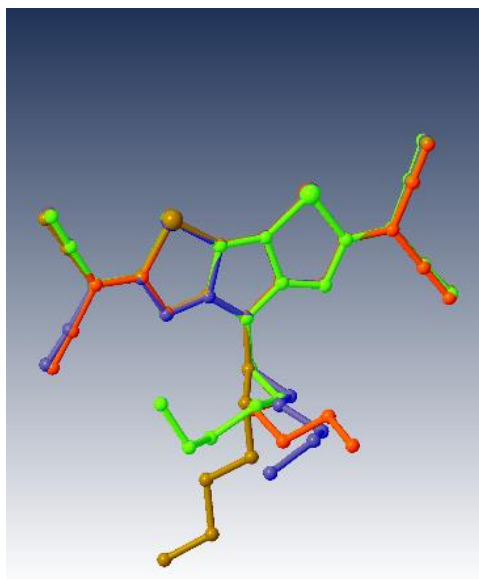

**Figure S4.** Overlay of the four independent molecules of compound **7** (1 is green; 1A is red; 1B is blue; 1C is brown).

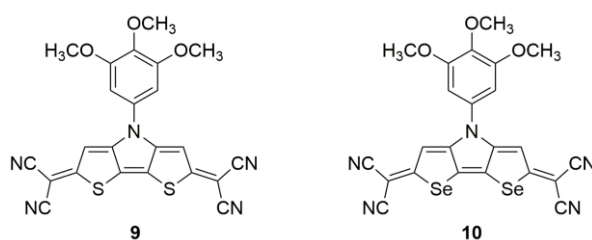

**Figure S5.** Structures of dithieno[3,2-*b*:2',3'-*d*]pyrrole (DTP) derivative (**9**) and diselenopheno[3,2-*b*:2',3'-*d*]pyrrole (DSP) derivative (**10**) investigated computationally.

|           | HOMO                                                                                                | LUMO                                                                                                 |
|-----------|-----------------------------------------------------------------------------------------------------|------------------------------------------------------------------------------------------------------|
| L7-methyl | 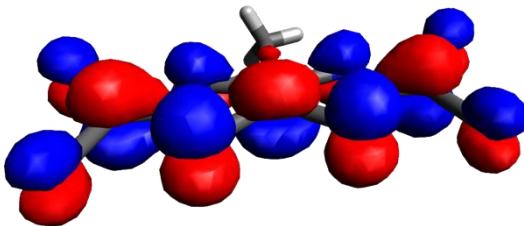<br>E = -9.31 eV   | <br>E = -3.03 eV   |
| 9         | <br>E = -8.55 eV   | <br>E = -2.60 eV   |
| 10        | <br>E = -8.51 eV | <br>E = -2.53 eV |

**Figure S6.** Pictorial representations and energies of the HOMO and LUMO for an *N*-methyl derivative of ligand **7** (L7-methyl), DTP derivative **9**, and DSP derivative (**10**) as determined at the OT-LC- $\omega$ PBE/cc-PVDZ level of theory.

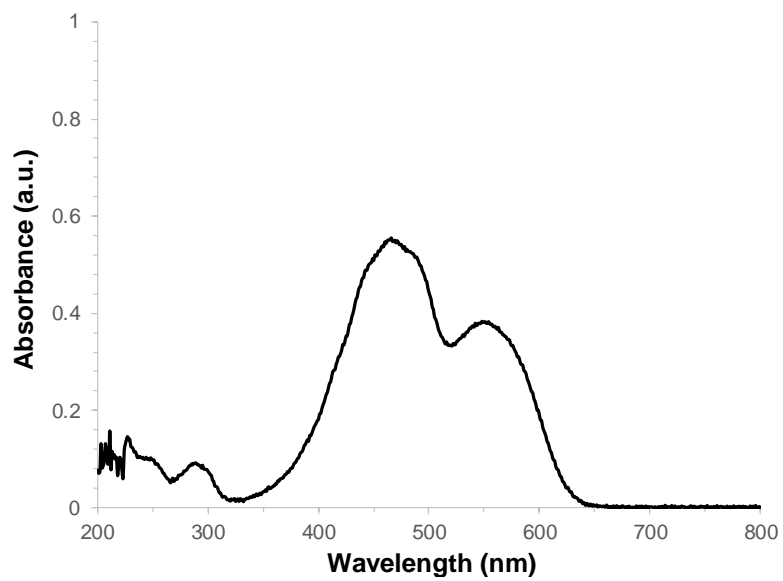

(a)

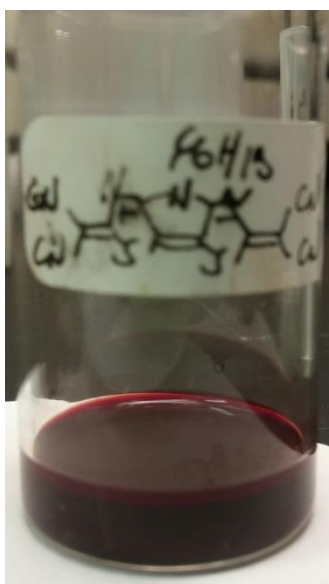

(b)

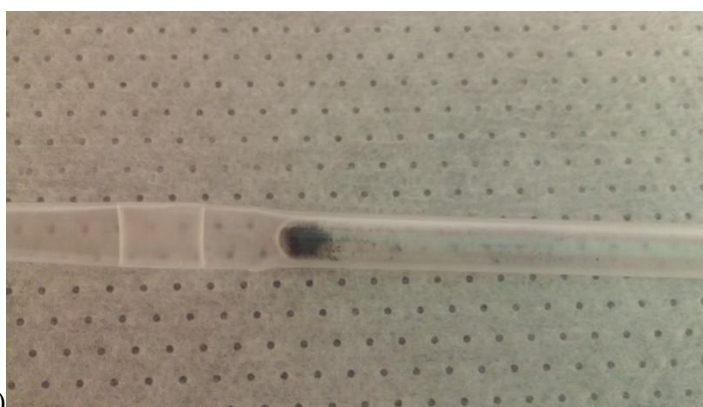

(c)

**Figure S7.** (a) UV-vis absorption spectra of ligand **7** in dichloromethane; (b) a photograph of a solution of ligand **7** in dichloromethane; (c) a photograph of the hybrid material **8** in a sealed quartz tube inside of a plastic straw.

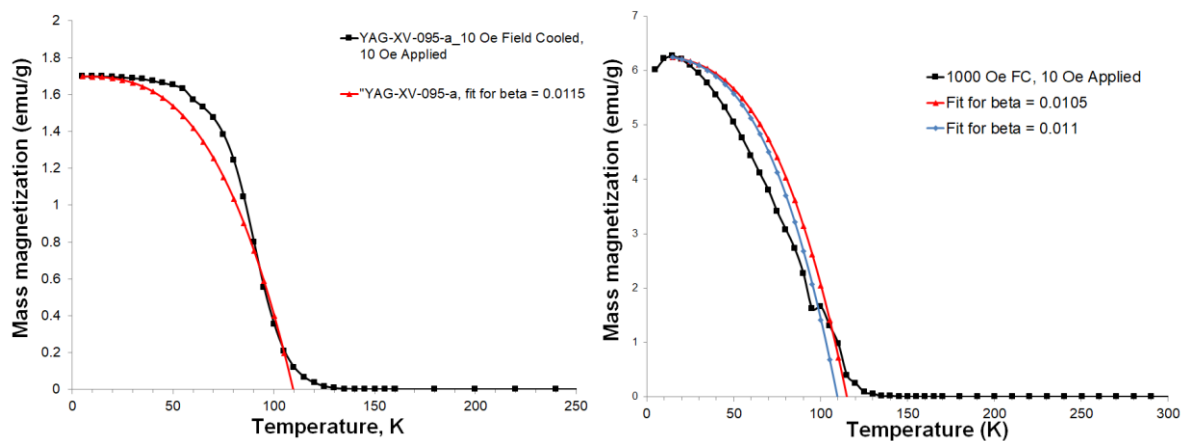

**Figure S8.** (*left*) Fit for the  $\beta = 0.0115 \text{ K}^{-3/2}$  for 1<sup>st</sup> batch YAG-XIV-095-a (estimated Curie temperature  $T_C \sim 110 \text{ K}$ ); (*right*) fit for the  $\beta = 0.0105$  and  $0.011 \text{ K}^{-3/2}$  for 2<sup>nd</sup> batch of **8** (YAG-XVI-022-b; estimated Curie temperature  $T_C \sim 115 \text{ K}$  and  $110 \text{ K}$ , respectively).

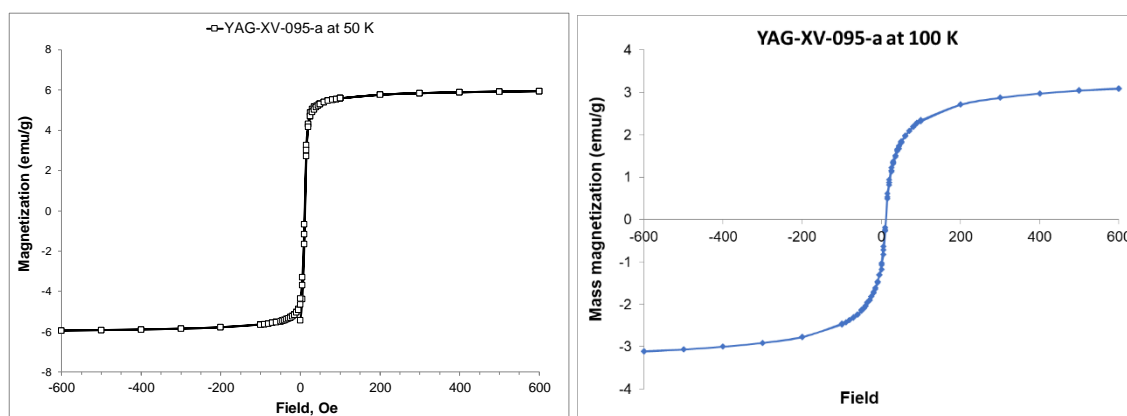

**Figure S9.** Hysteresis of **8** (first batch, YAG-XV-095-a) at (*left*) 50 K and (*right*) a 100 K.

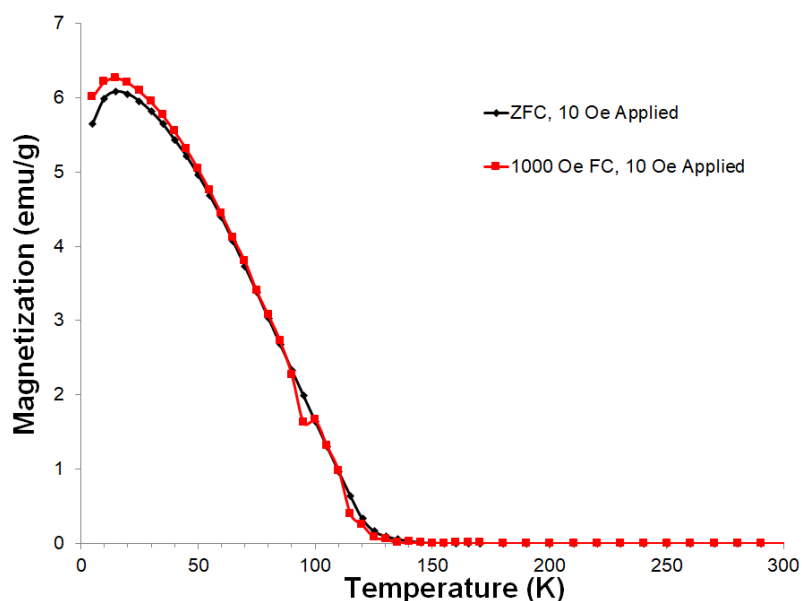

**Figure S10.** ZFC and FC temperature dependence of magnetization of material **8** (second independently prepared sample, YAG-XVI-022-b, ~1.1 mg of material **8** sealed in quartz tube).

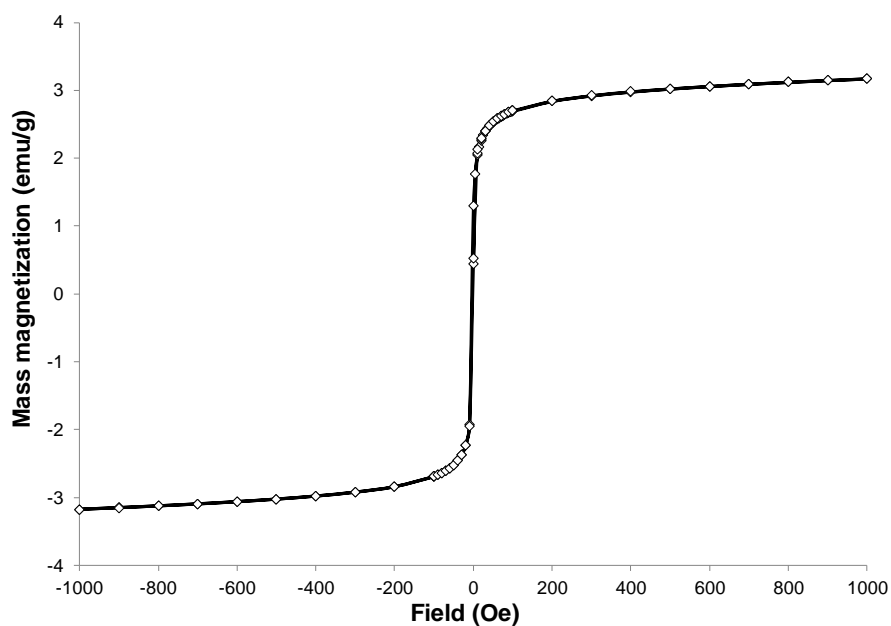

**Figure S11.** Hysteresis of **8** at 95 K (second independently prepared material, ~1.1 mg of YAG-XVI-022-b). Saturation magnetization is comparable to the 1<sup>st</sup> batch of **8** at 100 K (Figure S9, right).

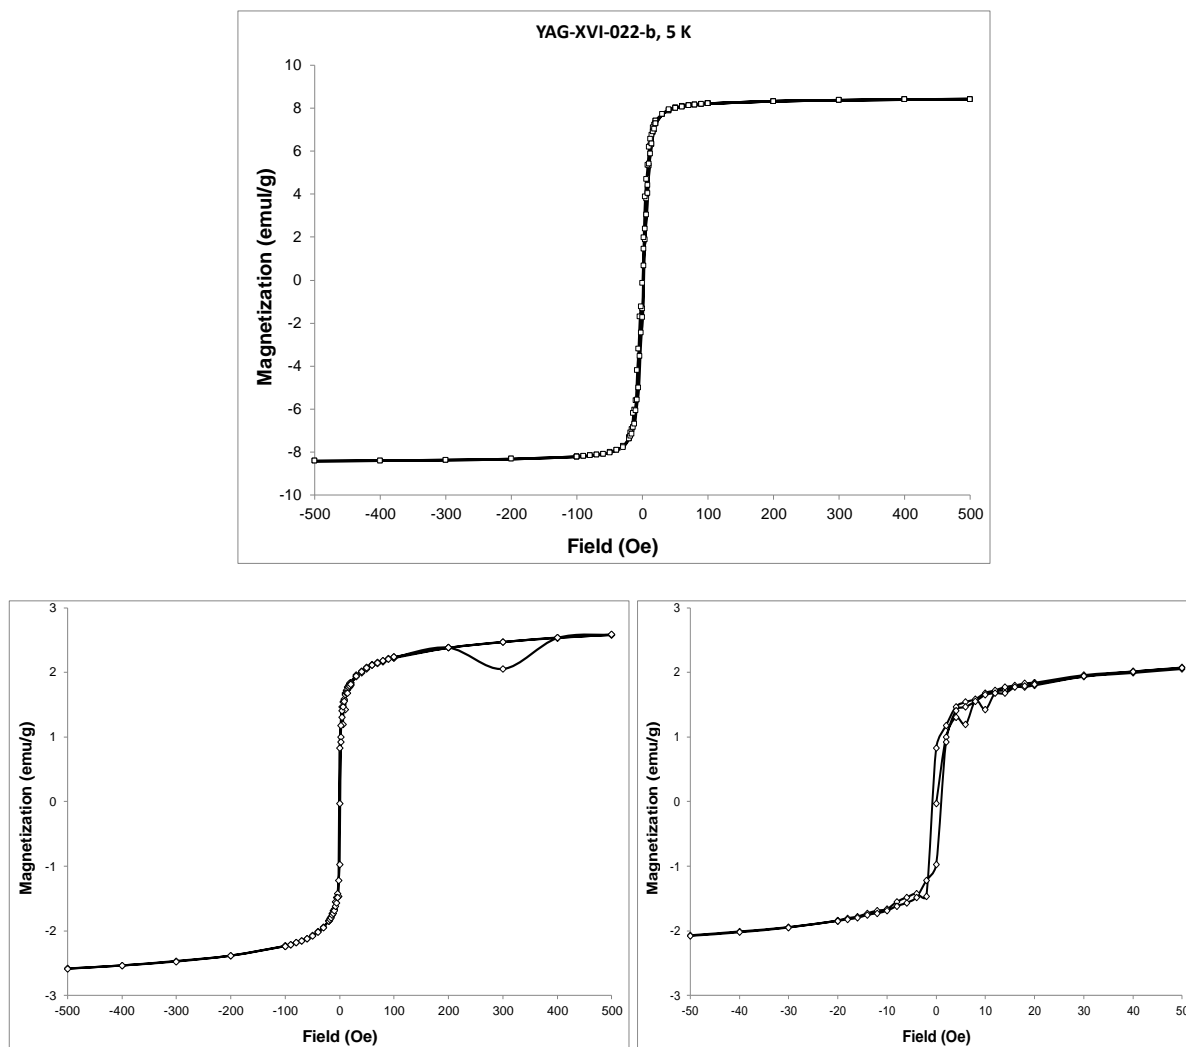

**Figure S12.** Hysteresis of material **8** (*top*) at 5 K, (*bottom left*) at 50 K and (*bottom right*) at 95 K for a second independently prepared sample (batch YAG-XVI-022-b). Saturation magnetization reached  $8.4 \text{ emu}\cdot\text{g}^{-1}$  at 500 Oe at 5 K (comparable to  $7.8 \text{ emu}\cdot\text{g}^{-1}$  measured for the first batch YAG-XIV-095-a).



**Table S1.** X-ray data and processing parameters for compounds 5-7.

|                                                             |                                                               |                                                                              |                                                               |
|-------------------------------------------------------------|---------------------------------------------------------------|------------------------------------------------------------------------------|---------------------------------------------------------------|
| CCDC entry no.                                              | 1819816                                                       | 1819817                                                                      | 1868490                                                       |
| Crystal system                                              | Monoclinic                                                    | Monoclinic                                                                   | Triclinic                                                     |
| Space group                                                 | <i>Cc</i>                                                     | <i>Cm</i>                                                                    | P-1                                                           |
| a, Å                                                        | 11.438(2)                                                     | 16.8767(2)                                                                   | 15.8211(3)                                                    |
| b, Å                                                        | 11.940(2)                                                     | 33.8581(5)                                                                   | 15.8245(3)                                                    |
| c, Å                                                        | 9.874(2)                                                      | 4.4165(1)                                                                    | 16.6689(2)                                                    |
| $\alpha$ , deg                                              | 90                                                            | 90                                                                           | 79.740(1)                                                     |
| $\beta$ , deg                                               | 107.370(2)                                                    | 91.650(1)                                                                    | 66.715(2)                                                     |
| $\gamma$ , deg                                              | 90                                                            | 90                                                                           | 73.107(2)                                                     |
| V, Å <sup>3</sup>                                           | 1287.0(4)                                                     | 2522.60(7)                                                                   | 3658.41(12)                                                   |
| Mol formula                                                 | C <sub>12</sub> H <sub>15</sub> N <sub>3</sub> S <sub>2</sub> | C <sub>12</sub> H <sub>13</sub> I <sub>2</sub> N <sub>3</sub> S <sub>2</sub> | C <sub>18</sub> H <sub>13</sub> N <sub>7</sub> S <sub>2</sub> |
| fw                                                          | 265.39                                                        | 517.17                                                                       | 391.47                                                        |
| Formula units per cell (Z)                                  | 4                                                             | 6                                                                            | 8                                                             |
| D <sub>calcd</sub> (Mg/m <sup>3</sup> )                     | 1.370                                                         | 2.043                                                                        | 1.422                                                         |
| $\lambda$ (Mo/Cu K $\alpha$ ), Å                            | 0.71073                                                       | 0.71073                                                                      | 1.54184                                                       |
| $\mu$ (mm <sup>-1</sup> )                                   | 0.395                                                         | 3.979                                                                        | 2.794                                                         |
| Absorption correction                                       | Semi-empirical from equivalents                               | Semi-empirical from equivalents                                              | Semi-empirical from equivalents                               |
| Total reflections                                           | 6623                                                          | 36525                                                                        | 48939                                                         |
| Independent reflections                                     | 2763                                                          | 5624                                                                         | 14247                                                         |
| R <sub>int</sub>                                            | 0.0183                                                        | 0.0237                                                                       | 0.0754                                                        |
| Data/res/parameters                                         | 2763 / 2 / 156                                                | 5624 / 5 / 260                                                               | 14247 / 0 / 977                                               |
| R1 <sup>a</sup> [ $I \geq 2\sigma(I)$ ]                     | 0.0203                                                        | 0.0187                                                                       | 0.0468                                                        |
| wR2 <sup>b</sup> (all data)                                 | 0.0509                                                        | 0.0479                                                                       | 0.1199                                                        |
| GOF on F <sup>2</sup>                                       | 1.052                                                         | 1.055                                                                        | 1.023                                                         |
| $\Delta\rho(\max)$ , $\Delta\rho(\min)$ (e/Å <sup>3</sup> ) | 0.141, -0.128                                                 | 0.888, -0.681                                                                | 0.583, -0.385                                                 |

<sup>a</sup>R1 =  $\Sigma||F_o| - |F_c||/\Sigma |F_o|$ ; <sup>b</sup>R2 =  $\{\Sigma[w(F_o^2 - F_c^2)^2]/\Sigma[w(F_o^2)^2]\}^{1/2}$

**Table S2.** Short intermolecular contacts between molecules of compound 7.

| Molecules 1...1A/1C | Distance Å | Molecules 1B/1A...1C/1B | Distance Å |
|---------------------|------------|-------------------------|------------|
| S(1)...S(2A)        | 3.439(1)   | S(1B)...S(2C)           | 3.500(1)   |
| S(1)...N(6A)        | 2.974(2)   | S(1B)...N(6C)           | 2.993(2)   |
| S(2)...N(6A)        | 3.052(2)   | S(2B)...N(6C)           | 3.091(2)   |
| N(4)...S(1A)        | 3.070(2)   | N(4B)...S(1C)           | 3.125(2)   |
| N(4)...S(2A)        | 3.002(2)   | S(2C)...N(4B)           | 3.056(2)   |
| C(2)...N(7C)        | 3.006(2)   | S(1A)...N(6B)           | 3.325(2)   |

**Table S3.** Comparison of the single-crystal X-ray structure for compound **7** and the OT-LC- $\omega$ PBE/cc-PVDZ optimized geometry for **L7-methyl**.

|                    | <b>Compound 7</b>     |  | <b>L7-methyl</b>      |
|--------------------|-----------------------|--|-----------------------|
| <u>Bond label</u>  | <u>Distance (Å)</u>   |  | <u>Distance (Å)</u>   |
| C2-N2              | 1.369                 |  | 1.371                 |
| C3-N2              | 1.378                 |  | 1.371                 |
| C3-C5              | 1.467                 |  | 1.461                 |
| C5-C6              | 1.352                 |  | 1.359                 |
| C2-C6              | 1.463                 |  | 1.462                 |
| N2-C13             | 1.473                 |  | 1.450                 |
| C2-N1              | 1.300                 |  | 1.295                 |
| N1-C1              | 1.378                 |  | 1.365                 |
| C1-S1              | 1.786                 |  | 1.801                 |
| S1-C6              | 1.712                 |  | 1.729                 |
| C3-N3              | 1.294                 |  | 1.295                 |
| N3-C4              | 1.381                 |  | 1.365                 |
| C4-S2              | 1.776                 |  | 1.801                 |
| S2-C5              | 1.720                 |  | 1.729                 |
|                    |                       |  |                       |
| <u>Angle label</u> | <u>Bond angle (°)</u> |  | <u>Bond angle (°)</u> |
| C1-S1-C6           | 88.21                 |  | 87.90                 |
| C4-S2-C5           | 87.98                 |  | 87.89                 |
| C1-N1-C2           | 107.23                |  | 108.66                |
| C3-N3-C4           | 107.26                |  | 108.73                |

**Table S4.** Select information pertaining to the  $S_0 \rightarrow S_1$  excitations as determined via TDDFT calculations at the OT-LC- $\omega$ PBE/cc-PVDZ level of theory.

| <b>Molecule</b>  | <b>E [eV]</b> | <b><math>\lambda</math> [nm]</b> | <b><math>f</math></b> | <b>Electronic Configuration</b> | <b>% contribution</b> |
|------------------|---------------|----------------------------------|-----------------------|---------------------------------|-----------------------|
| <b>L7-methyl</b> | 2.26          | 549                              | 0.37                  | HOMO-1 $\rightarrow$ LUMO;      | 43                    |
|                  |               |                                  |                       | HOMO $\rightarrow$ LUMO         | 56                    |
| TCNQ             | 3.13          | 396                              | 1.08                  | HOMO $\rightarrow$ LUMO         | 100                   |
| TCNE             | 4.80          | 258                              | 0.43                  | HOMO $\rightarrow$ LUMO         | 98                    |
| TCNB             | 4.62          | 268                              | 0.04                  | HOMO-1 $\rightarrow$ LUMO;      | 64                    |
|                  |               |                                  |                       | HOMO $\rightarrow$ LUMO+1       | 31                    |
| <b>9</b>         | 2.14          | 578                              | 0.0036                | HOMO-3 $\rightarrow$ LUMO;      | 37                    |
|                  |               |                                  |                       | HOMO-2 $\rightarrow$ LUMO;      | 7                     |
|                  |               |                                  |                       | HOMO-1 $\rightarrow$ LUMO       | 54                    |
|                  | 2.55          | 486                              | 1.37                  | HOMO $\rightarrow$ LUMO         | 100                   |
| <b>10</b>        | 2.00          | 618                              | 0.0104                | HOMO-3 $\rightarrow$ LUMO;      | 33                    |
|                  |               |                                  |                       | HOMO-2 $\rightarrow$ LUMO;      | 6                     |
|                  |               |                                  |                       | HOMO-1 $\rightarrow$ LUMO       | 58                    |
|                  | 2.53          | 491                              | 1.30                  | HOMO $\rightarrow$ LUMO         | 98                    |
